# Supplementary material for: Efficacy and safety of rituximab versus cyclophosphamide in primary membranous nephropathy: A systematic review and meta-analysis
Source: Research Square preprint supplement (doi:10.21203/rs.3.rs-8173549/v1), 2025-12-15
Supplement: Supplementary file 1 [file 9944cd21edd70a74fc0ac20b.xlsx]

## Sheet: Search strategy
	PubMed
#1	("Glomerulonephritis, Membranous"[MeSH] OR "membranous nephropathy"[tiab] OR "membranous glomerulonephritis"[tiab] OR "idiopathic membranous nephropathy"[tiab] OR "primary membranous nephropathy"[tiab] OR "membranous glomerulopathy"[tiab] OR "Heymann nephritis"[tiab])
#2	("Randomized Controlled Trial"[pt] OR "Controlled Clinical Trial"[pt] OR randomized[tiab] OR randomised[tiab] OR placebo[tiab] OR "clinical trial"[tiab] OR randomly[tiab] OR trial[tiab] OR groups[tiab]) OR ("Cohort Studies"[Mesh] OR "Case-Control Studies"[Mesh] OR "Cross-Sectional Studies"[Mesh] OR "Observational Study" [pt] OR cohort[tiab] OR "case control"[tiab] OR "case-control"[tiab] OR obser…
#3	("Rituximab"[Mesh] OR "Rituximab"[tiab]) AND ("Cyclophosphamide"[Mesh] OR "Cyclophosphamide"[tiab])
#4	(#1) AND (#2) AND (#3)
	Cochrane Library
#1	("membranous nephropathy" OR "membranous glomerulonephritis" OR "idiopathic membranous nephropathy" OR "primary membranous nephropathy" OR "membranous glomerulopathy" OR "Heymann nephritis")
#2	(randomized OR randomised OR randomly OR trial OR placebo) OR (cohort OR "case control" OR "case-control" OR observational OR "follow-up" OR prospective OR retrospective)
#3	(rituximab AND cyclophosphamide)
#4	(#1) AND (#2) AND (#3)
	Embase
#1	('membranous nephropathy'/exp OR 'membranous nephropathy':ti,ab OR 'primary membranous nephropathy':ti,ab OR 'idiopathic membranous nephropathy':ti,ab OR 'membranous glomerulonephritis':ti,ab OR 'membranous glomerulopathy':ti,ab OR 'Heymann nephritis':ti,ab)
#2	('randomized controlled trial'/de OR 'controlled clinical trial'/de OR random*:ti,ab OR placebo:ti,ab OR 'clinical trial':ti,ab OR trial:ti,ab OR groups:ti,ab) OR ('cohort analysis'/de OR 'case control study'/de OR 'cross-sectional study'/de OR 'observational study'/de OR cohort:ti,ab OR 'case control':ti,ab OR 'case-control':ti,ab OR observational:ti,ab OR longitudinal:ti,ab OR 'follow-up':ti,ab…
#3	('rituximab'/exp OR rituximab:ti,ab) AND ('cyclophosphamide'/exp OR cyclophosphamide:ti,ab)
#4	(#1) AND (#2) AND (#3)

## Sheet: Study Characteristics 
Table 1 Main characteristics of the studies included in the meta-analysis
Author	Year	Country	Sample Size(n)	Study Design/Jadad or NOS Score	Site	Treatment	Regimens	Follow-up	Outcomes
Fernandez-Juarez (STARMEN)	2020	Spain & Netherlands	43	RCT/3	M	RTX+TAC	intravenous rituximab (1 g) and tacrolimus dosage was reduced by 25% per month, with complete withdrawal after 3 months	24 months	CR,PR,TR at 6/9/12/18/24 months Relapse, AEs, SAEs
			43			CYC+CS	methylprednisolone at months 1, 3, and 5 (1 g intravenously at days 1, 2, and 3, then 0.5 mg/kg/day orally from day 4 to day 30). At months 2, 4, and 6, patients received oral cyclophosphamide adjusted for age and renal function (1.0–2.0 mg/kg/day for 30 days)
Scolari (RI-CYCLO)	2021	Italy & Switzerland	37	RCT/3	M	RTX	received two courses of rituximab at a dose of 1 g on days 1 and 15	36 months	CR,PR,TR at 6/9/12/18/24/36 months Relapse, AEs, SAEs
			37			CYC+CS	three consecutive cycles lasting for 2 months each (for a total of 6 months), where steroids were alternated with cyclophosphamide every other month; the cumulative dose of cyclophosphamide per patient was 180 mg/kg
Suresh	2025	India	34	RCT/3	S	RTX	RTX injection (500 mg) IV given on days 1 and 15. Each patient received premedication with injection methylprednisolone (125 mg), injection Pheniramine (45.5 mg), and tablet Paracetamol (500 mg)	12 months	CR,PR,TR at 6/12 months Relapse, AEs, SAEs
			34			CYC+CS	Cyclical therapy with 1g IV methylprednisolone daily (Days 1-3), then oral prednisolone (0.5 mg/kg/day) for 27 days (Days 4-30) on months 1, 3, and 5, alternating with oral cyclophosphamide (2.0 mg/kg/day) for 30 days on months 2, 4, and 6.
Van den Brand	2017	Italy & Switzerland	100	RC/7	M	RTX	four weekly doses of 375 mg/m2 RTX infused intravenously.	40 months	CR,PR,TR at last follow-up, Relapse, AEs, SAEs
			103			CYC+CS	Oral cyclophosphamide (1.5 mg/kg daily) was administered for 6–12 months, and methylprednisolone pulses (1 g) were infused on days 1–3, 61–63, and 121–123 in combination with 0.5 mg/kg oral prednisone every other day for 5 months before tapering.
Fan Zhu	2021	China	26	R	S	RTX+TAC	Low dose tacrolimus was given at 0.025 mg/kg/d initially, once the patients have achieved partial or complete response, the dose was tapered to 0.5 mg per day.	12 months
			41			TAC	an initial dose of 0.05 mg/kg/day p.o. divided into 2 equal doses given at 12 h intervals and adjusted to a serum concentration level at 4 to 10 ng/mL for 6 months. Then the dose was tapered gradually to 0.5 mg per day at the end of 12 months.
Zhou	2025	China	21	RC/5	S	RTX	1000 mg on day 1 and day 15	12 months	CR,PR,TR at 6/12 months, AEs
			14			CYC+CS	intravenous infusion (0.5 to 0.75 g/m2 /month, maximum dose is 1 g/month, the cumulative dose of cyclophosphamide - 9 to 10g
Ramachandran	2021	India	13	PC/6	S	RTX	3 received weekly (×4) doses of 375 mg/m2 , 4 received 2 doses of 1 g (×2) 15 days apart, and 6 re_x0002_ceived CD-19 targeted dosing	26 months	TR at 12/24 months, AEs
			49			CYC+CS	Cyclical Regimen
Fenoglio	2020	Italy	14	RC/6	M	Low-Dose RTX	one dose of RTX 375 mg/m2	24 months	CR, PR, TR at 24 months, Relapse, AEs
			14			Standard RTX	four weekly doses of rituximab 375 mg/m2
			14			CYC+CS	Ponticelli Regimen: patients received methylprednisolone at months 1, 3, and 5 (1 g intravenously at days 1, 2, and 3, then 0.5 mg/kg/day orally from day 4 to day 30). At months 2, 4, and 6, patients received oral cyclophosphamide adjusted for age and renal function (1.0–2.0 mg/kg/day for 30 days)
Medrano	2014	Spain	53	RC/5	S	RTX+TAC	The first 23 patients treated with this regime received a total of four weekly doses of 375 mg/m2 , and the last 30 patients received two 1-gram doses administered at an interval of 15 d.	12 months	CR, PR, TR at 12 months
			26			CYC+CS	Ponticelli Regimen
Nie	2023	China	43	RC/5	S	RTX	one dose of rituximab 375 mg/m2, once weekly	6 months	CR, PR, TR at 6 months, Relapse, AEs
			43			CYC+CS	0.8–1.0 g intravenously, once monthly; If clinical complete or partial remission is achieved after 6 months of treatment, continue therapy for an additional 3 months (cumulative dose <10 g)
Lu	2024	China	86	RC/6	S	RTX	a dose of 375mg/m2 intravenous rituximab once every two weeks until their peripheral blood B-cell count was 0/µl.	18 months	CR, PR, TR at 6/12/18 months, Relapse, AEs
			86			CYC+CS	a single dose of 500–750 mg/m2 by intravenous infusion monthly for the initial 6 months, and once every 2–3 months for the later period.All patients in CYC group received a combination of oral prednisone 0.6–0.8 mg/kg/d for 4–8 weeks, and gradually tapered.
Wang	2024	China	40	RC/6	M	RTX	received intravenous RTX at a dose of 375mg/m2 once a week for 4 consecutive weeks or 1g every 2 weeks (a total of two times as a course of treat_x0002_ment). At least two doses of 375mg/m2 or one dose of 1g RTX therapy was repeated 4–6 months later to maintain the effect of RTX.	24 months	CR, PR, TR at 6/12/24 months, Relapse, AEs
			27			CYC+CS	the initial oral corticosteroid dose was 1mg/kg/day (maximum dose was 60mg), tapered after 8–12 weeks until withdrawal. Intermittent intravenous CYC was given monthly at 10–15mg/kg for six months (generally 0.6–1.0g/month), followed by an additional dose of the same approximately every 3 months for the next 6 months. The total dose of CTX generally reached 6–8g and did not exceed 10g.
Hu	2024	China	70	PC/6	S	RTX	a dose of 375 mg/m2 every week for a total of 4 doses. Methylprednisolone 40 mg i.v. will be given before the first dose. Chlorpheniramine (10 mg) and acetaminophen (500 mg) or other similar drugs will be given orally before each infusion to prevent allergic reactions	24 months	CR, PR, TR at 6/12/18/24 months, Relapse, AEs, SAEs
			71			CYC+CS	oral prednisone starting at 0.8 mg/kg/24 h combined with intravenous CTX at a dose of 500 mg/m2 every 4 weeks until the total amount administered reached 6–8 g. Oral prednisone was maintained for 8 weeks and then tapered gradually to 5–10 mg every 4 weeks and may be stopped at 1 year
Wu	2025	China	58	RC/6	S	RTX	received either a weekly intravenous infusion of 375 mg/m² for four consecutive weeks, or 1 g every two weeks (for a total of two doses as one treatment course). To reduce infusion reactions, patients received 40 mg of intravenous methylprednisolone prior to each infusion.	18 months	CR, PR, TR at 6/12/18 months, AEs, SAEs
			55			CYC+CS	the initial oral corticosteroid dose was 1 mg·kg⁻¹·d⁻¹ (maximum 60 mg), which was gradually tapered off and discontinued after 8–12 weeks. Cyclophosphamide was administered intermittently via intravenous infusion at a monthly dose of 10–15 mg/kg for 6 months (typically 0.6–1.0 g/month), followed by additional doses administered approximately every 3 months over the next 6 months. The total cumula…
	RCT: randomized controlled trial, PC: prospective cohort, RC: retrospective cohort, M: multicenter, S: single-center, RTX: rituximab, TAC: tacrolimus, CYC: cyclophosphamide, CS: glucocorticoids. CR: complete remission, a reduction in proteinuria from baseline to a value ≤0.3 g/24 h plus stable kidney function (eGFR >45 ml/min per 1.73 m2); PR: partial remission, a reduction in proteinuria >50% fr…

## Sheet: Outcomes and definitions
Table 2 Outcome data of the 13 included studies
Author	Year	Treatment	Sample Size(n)	CR				TR(PR+TR)				Relapse	AEs	SAE patients	Follow-up
				6 months	12 months	18 months	24 months	6 months	12 months	18 months	24 months
Fernandez-Juarez (STARMEN)	2020	RTX+TAC	43	0/43	4/43	7/43	11/43	19/43	22/43	23/43	25/43	3/25	39/43	6/43	24 months
		CYC+CS	43	6/43	14/43	19/43	26/43	32/43	34/43	36/43	36/43	1/36	42/43	8/43
Scolari (RI-CYCLO)	2021	RTX	37	3/37	6/37	10/32	11/26	19/37	23/37	21/32	22/26	3/23	16/37	7/37	24 months
		CYC+CS	37	2/37	12/37	7/34	11/31	24/37	27/37	27/34	25/31	6/27	16/37	5/37
Suresh	2025	RTX	34	3/30	3/27	NA	NA	15/30	16/27	NA	NA	5/20	13/34	6/34	12 months
		CYC+CS	34	4/29	4/23	NA	NA	17/29	16/23	NA	NA	4/21	22/34	8/34
Van den Brand	2017	RTX	100	NA	NA	NA	26/100a	NA	NA	NA	64/100a	3/64	41/100	9/100	40 months
		CYC+CS	103	NA	NA	NA	34/103a	NA	NA	NA	89/103a	6/89	58/103	30/103
Zhou	2025	RTX	21	4/21	5/21	NA	NA	14/21	18/21	NA	NA	NA	4/21	NA	12 months
		CYC+CS	14	3/14	7/14	NA	NA	11/14	13/14	NA	NA	NA	6/14	NA
Ramachandran	2021	RTX	13	NA	NA	NA	NA	NA	3/13	NA	5/13a	NA	9/13	NA	24 months
		CYC+CS	49	NA	NA	NA	NA	NA	23/49	NA	24/49a	NA	24/49	NA
Fenoglio	2020	Low-dose RTX	14	NA	NA	NA	12/14	NA	NA	NA	13/14	1/13	1/14	NA	24 months
		Standard RTX	14	NA	NA	NA	13/14	NA	NA	NA	13/14	1/13	3/14	NA
		CYC+CS	14	NA	NA	NA	12/14	NA	NA	NA	12/14	1/12	3/14	NA
Medrano	2014	RTX+TAC	53	NA	28/53	NA	NA	NA	49/53	NA	NA	NA	NA	NA	12 months
		CYC+CS	26	NA	6/26	NA	NA	NA	19/26	NA	NA	NA	NA	NA
Nie	2023	RTX	43	7/43	NA	NA	NA	26/43	NA	NA	NA	1/26	5/43	NA	6 months
		CYC	43	6/43	NA	NA	NA	23/43	NA	NA	NA	2/23	6/43	NA
Lu	2024	RTX	86	2/86	9/74	18/86	NA	31/86	51/74	59/86	NA	2/59	23/86	NA	12 months
		CYC+CS	86	3/86	11/66	18/86	NA	33/86	36/66	47/86	NA	2/47	25/86	NA
Wang	2024	RTX	40	2/40	9/40	NA	22/40	27/40	35/40	NA	37/40	2/37	15/40	NA	24 months
		CYC	27	2/27	7/27	NA	9/27	20/27	21/27	NA	20/27	7/20	23/27	NA
Hu	2024	RTX	70	3/70	10/70	15/59	22/61	43/70	43/70	42/59	46/61	2/46	20/70	2/70	24 months
		CYC+CS	71	8/71	24/71	21/64	22/58	44/71	54/71	44/64	40/58	2/40	29/71	6/71
Wu	2025	RTX	58	6/58	8/31	7/19	NA	36/58	26/31	14/19	NA	NA	21/58	11/58	18 months
		CYC+CS	55	8/55	14/48	13/38	NA	38/55	34/48	28/38	NA	NA	26/55	11/55

## Sheet: Assessing risk of bias
Table 3. Assessing the risk of bias of the included studies via the validated Jadad 5-point scale
RCTs	Publication year	Country	Sample size (n)	Study Design	Randomization (0-2 points)	Double-blind (0-2 points)	Drop-outs and withdrawals (0-1 points)	Jadad score
STARMEN	2020	Spain	86	multicenter, open-labelled, parallel	2	0	1	3
RI-CYCLO	2021	Italy	74	single-center, open-labelled, parallel	2	0	1	3
Suresh	2025	India	68	single-center, open-labelled, parallel	2	0	1	3
Table 4. Assessment of the quality of the included cohort studies by the NOS
Studies	Selection				Comparability	Outcome assessment			NOS score
	1)	2)	3)	4)	5)	6)	7)	8)
Medrano 2014	a	a	a	a	a	b	b	d	5
van den Brand 2017	a	a	a	a	a	b	a	b	7
Fenoglio 2020	a	a	a	a	a	b	a	d	6
Ramachandran 2021	a	a	a	a	a	b	a	d	6
Zhou 2025	a	a	a	a	a	b	b	d	5
Nie 2023	a	a	a	a	a	b	b	d	5
Lu 2024	a	a	a	a	a	b	a	d	6
Wang 2024	a	a	a	a	a	b	a	d	6
Hu 2024	a	a	a	a	a	b	a	d	6
Wu 2025	a	a	a	a	a	b	a	d	6
1) Representativeness of the exposed cohort; 2) selection of the non-exposed cohort; 3) ascertainment of exposure; 4) demonstration that outcome of interest was not present at start of study; 5) comparability of cohorts on the basis of the design or analysis; 6) assessment of outcome; 7) was follow-up long enough for outcomes to occur; 8) adequacy of follow up of cohorts.
